# Supplementary material
Source: PubMed Central journal article supplement (PMC1226316)
Supplement: nar_33_16_5362__1.pdf [file nar_33_16_5362__1.pdf]

## Supplemental data

Observed percentages for editing of adenosine pairs within the same substrate molecule, theoretically expected values (based on the editing extents at the individual positions) and the value for correlation (value of 1 corresponds to perfect correlation). All values have a statistical significance of  $p < 0.01$ .

**Table S1 A:** ADAR1-L activity on 5' [CG]<sub>6</sub> containing dsRNA substrate.

| Adenosine position | 5' CG        |              |             | 15' CG       |              |             | 30' CG       |              |             |
|--------------------|--------------|--------------|-------------|--------------|--------------|-------------|--------------|--------------|-------------|
|                    | Observed [%] | Expected [%] | Correlation | Observed [%] | Expected [%] | Correlation | Observed [%] | Expected [%] | Correlation |
| 3, 5               | 1.40         | 0.00         | 0.018       | 14.30        | 4.30         | 0.346       | 14.60        | 2.70         | 0.089       |
| 3, 6               | 1.40         | 0.10         | 0.056       | 6.20         | 4.30         | 0.153       | 6.40         | 2.10         | 0.144       |
| 3, 7               | 6.30         | 3.40         | 0.198       | 6.20         | 4.90         | 0.111       | 8.30         | 3.70         | 0.051       |
| 3, 8               | 8.30         | 3.60         | 0.330       | 10.10        | 7.20         | 0.206       | 10.50        | 4.30         | 0.038       |
| 4, 11              | 4.90         | 0.80         | 0.021       | 0.00         | 0.00         | 0.000       | 6.10         | 2.10         | 0.041       |
| 4, 12              | 4.20         | 0.60         | 0.026       | 0.00         | 0.00         | 0.000       | 8.10         | 1.20         | 0.484       |
| 4, 8               | 2.80         | 1.50         | 0.030       | 2.50         | 2.40         | 0.035       | 9.0          | 1.20         | 0.129       |
| 5, 10              | 1.40         | 0.00         | 0.131       | 5.20         | 3.80         | 0.116       | 0.00         | 0.00         | 0.031       |
| 5, 11              | 5.60         | 1.30         | 0.421       | 6.00         | 0.50         | 0.201       | 8.30         | 3.50         | 0.381       |
| 5, 6               | 12.50        | 1.90         | 0.890       | 18.00        | 10.10        | 0.766       | 18.60        | 10.50        | 0.732       |
| 5, 7               | 11.10        | 4.40         | 0.423       | 21.30        | 11.50        | 0.473       | 22.90        | 18.20        | 0.229       |
| 5, 8               | 11.10        | 4.60         | 0.408       | 25.70        | 16.90        | 0.437       | 14.60        | 8.20         | 0.364       |
| 6, 10              | 1.40         | 0.50         | 0.105       | 5.20         | 3.80         | 0.022       | 0.00         | 0.00         | 0.071       |
| 6, 11              | 5.60         | 1.60         | 0.361       | 2.30         | 2.10         | 0.006       | 6.30         | 4.70         | 0.475       |
| 6, 12              | 6.30         | 0.95         | 0.608       | 1.70         | 0.80         | 0.011       | 6.30         | 1.50         | 0.428       |
| 6, 16              | 1.40         | 2.30         | 0.163       | 1.70         | 0.70         | 0.045       | 2.00         | 0.90         | 0.271       |
| 6, 7               | 11.10        | 5.40         | 0.331       | 18.40        | 6.90         | 0.320       | 20.80        | 14.10        | 0.151       |
| 6, 8               | 11.10        | 5.60         | 0.316       | 15.90        | 10.10        | 0.437       | 16.70        | 16.80        | 0.301       |
| 7, 8               | 25.70        | 13.00        | 0.848       | 26.80        | 11.60        | 0.804       | 52.10        | 32.80        | 0.788       |
| 7, 10              | 3.50         | 0.10         | 0.209       | 3.70         | 3.80         | 0.190       | 0.00         | 0.00         | 0.035       |
| 7, 11              | 10.40        | 3.70         | 0.460       | 5.40         | 2.10         | 0.225       | 14.60        | 4.70         | 0.044       |
| 7, 12              | 3.50         | 3.80         | 0.169       | 1.70         | 0.80         | 0.023       | 4.20         | 2.60         | 0.123       |
| 8, 10              | 2.10         | 0.20         | 0.129       | 7.50         | 3.80         | 0.271       | 0.00         | 0.00         | 0.026       |
| 8, 11              | 7.60         | 3.90         | 0.258       | 9.30         | 3.50         | 0.225       | 10.40        | 5.60         | 0.054       |
| 8, 12              | 4.20         | 1.60         | 0.160       | 2.90         | 1.20         | 0.032       | 6.30         | 3.10         | 0.031       |

**Table S1 B:** ADAR1-L activity on 5' [CCGG]<sub>3</sub> containing dsRNA substrate.

| <i>Adenosine position</i> | <i>5' CCGG</i> |              |             | <i>15' CCGG</i> |              |             | <i>30' CCGG</i> |              |             |
|---------------------------|----------------|--------------|-------------|-----------------|--------------|-------------|-----------------|--------------|-------------|
|                           | Observed [%]   | Expected [%] | Correlation | Observed [%]    | Expected [%] | Correlation | Observed [%]    | Expected [%] | Correlation |
| 1, 2                      | 2.3            | 0.1          | 0.812       | 0.0             | 0.0          | 0.000       | 0.0             | 0.0          | 0.000       |
| 1, 3                      | 1.1            | 0.0          | 0.392       | 0.0             | 0.0          | 0.000       | 0.0             | 0.0          | 0.000       |
| 1, 4                      | 1.1            | 0.0          | 0.571       | 0.0             | 0.0          | 0.000       | 0.0             | 0.0          | 0.000       |
| 1, 7                      | 1.1            | 0.0          | 0.260       | 0.0             | 0.0          | 0.000       | 0.0             | 0.0          | 0.000       |
| 1, 8                      | 1.1            | 0.0          | 0.159       | 0.0             | 0.0          | 0.000       | 0.0             | 0.0          | 0.000       |
| 2, 3                      | 1.1            | 0.1          | 0.489       | 4.9             | 1.5          | 0.714       | 0.0             | 0.0          | 0.000       |
| 2, 4                      | 0.0            | 0.0          | 0.000       | 1.0             | 0.1          | 0.009       | 0.0             | 0.0          | 0.000       |
| 2, 5                      | 1.1            | 0.1          | 0.001       | 1.4             | 0.0          | 0.012       | 1.0             | 0.0          | 0.268       |
| 2, 7                      | 1.1            | 0.1          | 0.333       | 1.4             | 0.3          | 0.003       | 1.0             | 0.0          | 0.184       |
| 2, 8                      | 1.1            | 0.2          | 0.217       | 1.4             | 1.1          | 0.015       | 1.7             | 0.1          | 0.198       |
| 3, 4                      | 1.1            | 0.1          | 0.703       | 2.0             | 0.1          | 0.400       | 1.0             | 0.0          | 0.396       |
| 3, 5                      | 0.0            | 0.0          | 0.010       | 4.4             | 0.5          | 0.815       | 1.0             | 0.4          | 0.208       |
| 3, 6                      | 0.0            | 0.0          | 0.023       | 5.9             | 1.0          | 0.405       | 0.0             | 0.0          | 0.059       |
| 3, 8                      | 0.0            | 0.0          | 0.048       | 2.0             | 0.2          | 0.218       | 1.7             | 0.1          | 0.127       |
| 5, 6                      | 0.0            | 0.0          | 0.016       | 7.9             | 2.4          | 0.606       | 4.2             | 0.6          | 0.715       |
| 5, 8                      | 0.0            | 0.0          | 0.034       | 6.9             | 2.1          | 0.564       | 2.5             | 1.6          | 0.098       |
| 6, 10                     | 1.1            | 0.0          | 0.489       | 0.0             | 0.0          | 0.062       | 1.8             | 0.5          | 0.334       |
| 6, 8                      | 0.0            | 0.0          | 0.048       | 4.4             | 0.9          | 0.405       | 9.3             | 3.6          | 0.198       |
| 6, 9                      | 1.1            | 0.0          | 0.392       | 0.0             | 0.0          | 0.060       | 0.0             | 0.0          | 0.000       |
| 7, 10                     | 1.1            | 0.2          | 0.331       | 0.0             | 0.0          | 0.000       | 0.0             | 0.0          | 0.000       |
| 7, 8                      | 1.1            | 0.1          | 0.121       | 5.7             | 1.1          | 0.132       | 8.5             | 2.8          | 0.711       |
| 9, 12                     | 1.1            | 0.2          | 0.392       | 0.0             | 0.0          | 0.000       | 0.0             | 0.0          | 0.000       |
| 9, 13                     | 1.1            | 0.1          | 0.388       | 0.0             | 0.0          | 0.000       | 0.0             | 0.0          | 0.000       |
| 11, 12                    | 1.1            | 0.1          | 0.489       | 1.0             | 0.4          | 0.479       | 1.7             | 0.1          | 0.898       |
| 12, 13                    | 1.1            | 0.1          | 0.412       | 0.0             | 0.0          | 0.000       | 0.8             | 0.4          | 0.338       |
